# Supplementary material
Source: PubMed Central journal article supplement (PMC7716777)
Supplement: NIHMS1647488-supplement-1.pdf [file NIHMS1647488-supplement-1.pdf]

**Table S1. Scores on CERAD measures at the Time of Diagnosis of MCI, Probable Dementia and Either by Depressive Disorder Status Median (Min-Max)**

| <b>CERAD</b>                                 |                           |                        |                |                                          |                |                                              |                            |
|----------------------------------------------|---------------------------|------------------------|----------------|------------------------------------------|----------------|----------------------------------------------|----------------------------|
| <b>Battery /<br/>Depressive<br/>Disorder</b> | <b>Possible<br/>Range</b> | <b>MCI<br/>(N=216)</b> | <b>P value</b> | <b>Probable<br/>Dementia<br/>(N=102)</b> | <b>P value</b> | <b>MCI/Probable<br/>dementia<br/>(N=285)</b> | <b>p-value<sup>1</sup></b> |
| <b>CERAD Word</b>                            |                           |                        |                |                                          |                |                                              |                            |
| <b>List-Delayed</b>                          | 0-10                      |                        |                |                                          |                |                                              |                            |
| Yes                                          |                           | 4 [0-8]                | 0.61           | 3 [0-7]                                  | 0.06           | 4 [0-8]                                      | 0.43                       |
| No                                           |                           | 4 [0-10]               |                | 2 [0-7]                                  |                | 3 [0-10]                                     |                            |
| <b>CERAD</b>                                 |                           |                        |                |                                          |                |                                              |                            |
| <b>Constructional<br/>Praxis-Recall</b>      | 0-11                      |                        |                |                                          |                |                                              |                            |
| Yes                                          |                           | 9 [5-11]               | 0.04           | 8 [6-11]                                 | 0.33           | 9 [5-11]                                     | 0.09                       |
| No                                           |                           | 9 [2-11]               |                | 9 [5-11]                                 |                | 9 [2-11]                                     |                            |
| <b>CERAD</b>                                 |                           |                        |                |                                          |                |                                              |                            |

| <b>Category</b>                 | unlimited |              |      |               |      |              |      |
|---------------------------------|-----------|--------------|------|---------------|------|--------------|------|
| <b>Fluency</b>                  |           |              |      |               |      |              |      |
| Yes                             |           | 11 [3-17]    | 0.02 | 9 [4-16]      | 0.86 | 11 [3-17]    | 0.05 |
| No                              |           | 12 [3-25]    |      | 10 [2-20]     |      | 12 [3-25]    |      |
| <b>Boston</b>                   |           |              |      |               |      |              |      |
| <b>Naming Test-<br/>15 item</b> |           |              |      |               |      |              |      |
| Yes                             | 0-15      | 13 [7-15]    | 0.88 | 12 [7-15]     | 0.09 | 13 [7-15]    | 0.68 |
| No                              |           | 13 [2-15]    |      | 13 [2-15]     |      | 13 [2-15]    |      |
| <b>Trail Making</b>             |           |              |      |               |      |              |      |
| <b>Test-Part A</b>              |           |              |      |               |      |              |      |
| Yes                             | 0-300     | 67 [30-194]  | 0.08 | 77 [40-174]   | 0.85 | 70 [30-194]  | 0.20 |
| No                              |           | 56 [25-300]  |      | 78 [31-300]   |      | 60 [25-300]  |      |
| <b>Trail Making</b>             |           |              |      |               |      |              |      |
| <b>Test-Part B</b>              |           |              |      |               |      |              |      |
| Yes                             | 0-300     | 151 [78-240] | 0.26 | 174 [107-300] | 0.41 | 158 [78-300] | 0.34 |
| No                              |           | 152 [61-300] |      | 218 [50-300]  |      | 179 [50-300] |      |

**Notes:** CERAD: The Consortium to Establish A Registry for Alzheimer's Disease; MCI: mild cognitive impairment; <sup>1</sup> Wilcoxon test with significance level set to be 0.01 to control for multiple comparisons
